# Supplementary material for: Genetic and phenotypic differentiation between invasive and native Rhododendron (Ericaceae) taxa and the role of hybridization
Source: PubMed Central journal article supplement (PMC3287310; doi:10.1002/ece3.38), 2011-11

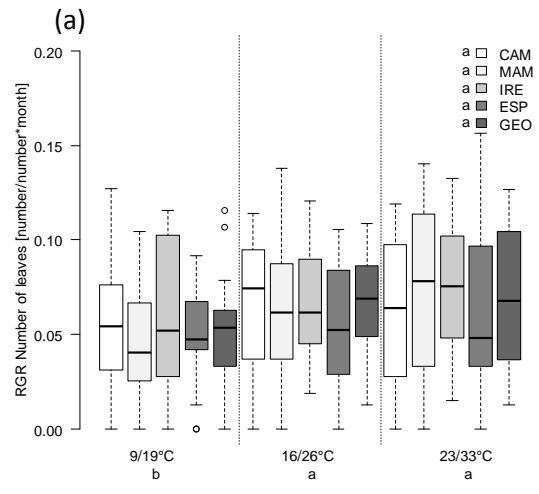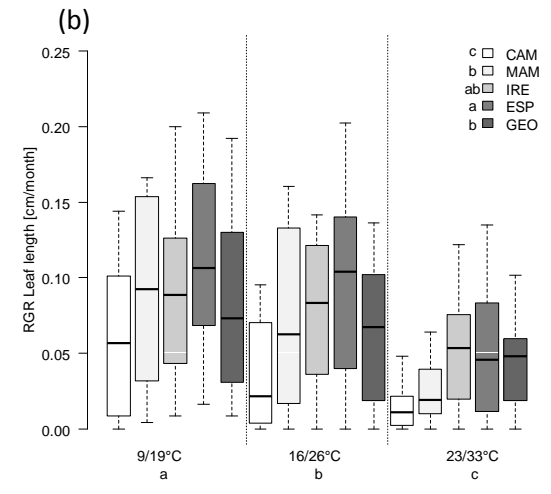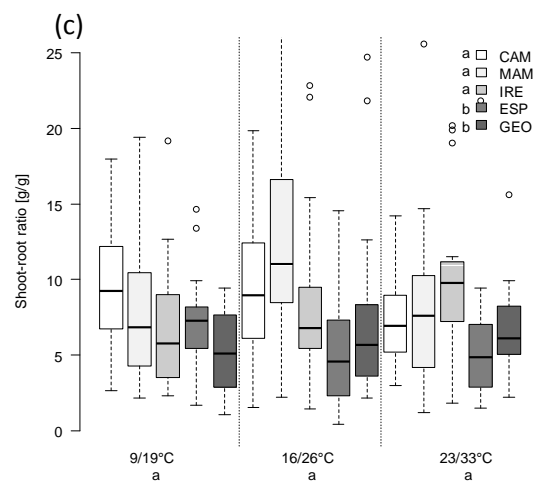

Supplement: ece30001-0392-SD2.pdf [file ece30001-0392-SD2.pdf]
